# Supplementary material
Source: Springer Nature journal article supplement (https://www.springermedizin.de/resource/supplementary/12935_2013_408_MOESM2_ESM.pdf/9540436)

Effect of taxol combined with PEITC (1-10) $\mu$ M on breast cancer cell lines

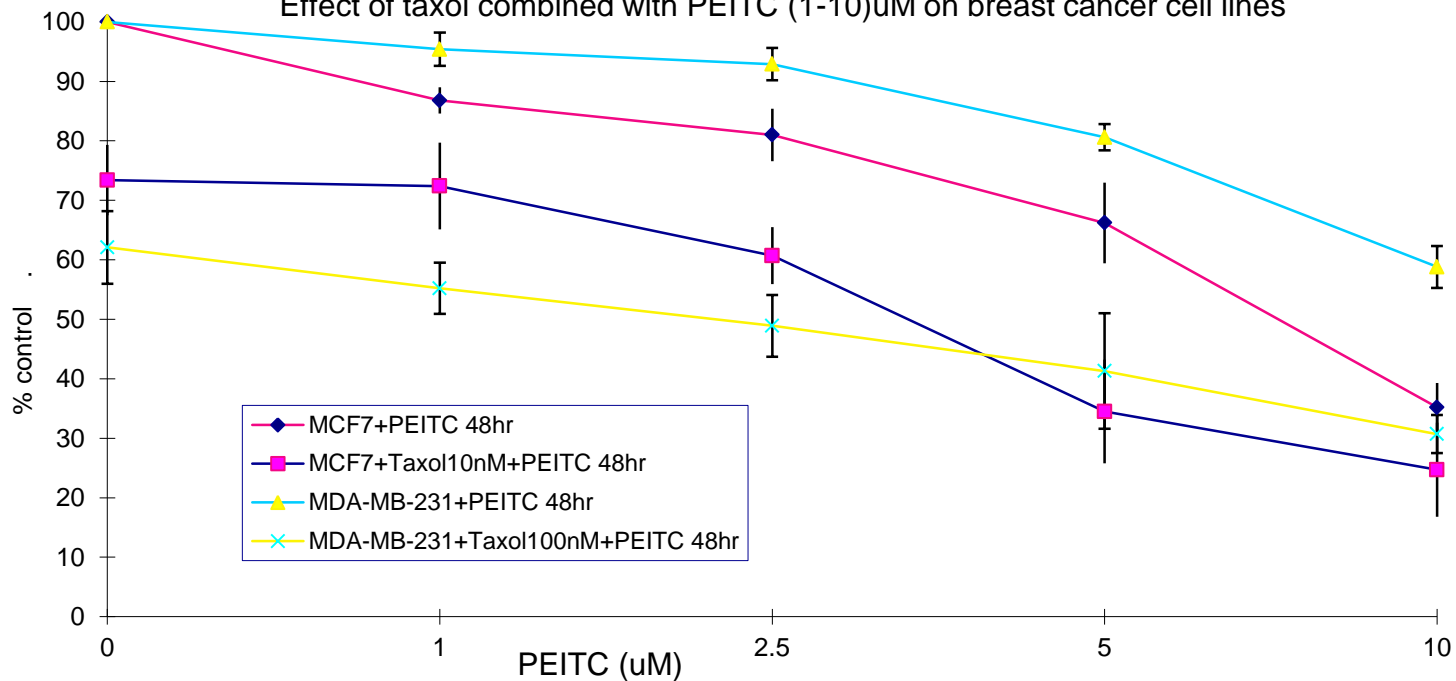

Effect of PEITC combined with Taxol (1-1000)nM on breast cancer cell lines

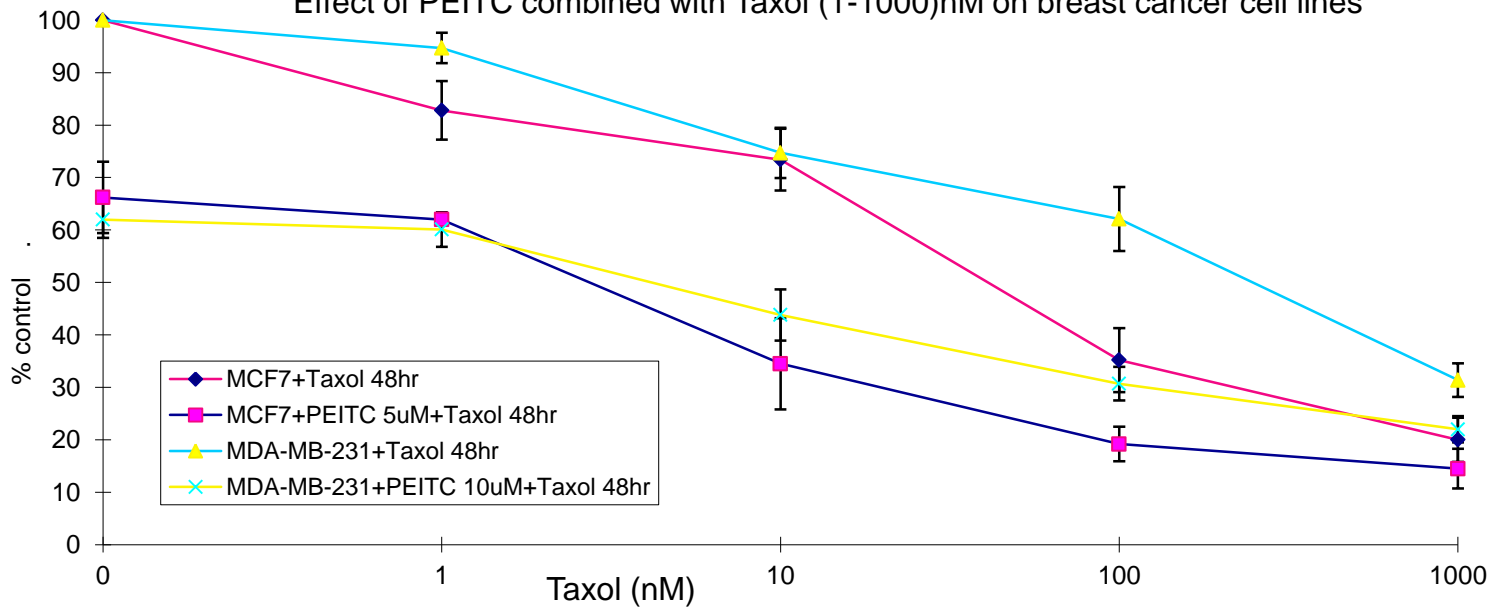

Supplement: MOESM2 [file 9540436]
